# Supplementary material
Source: PubMed Central journal article supplement (PMC5369841)
Supplement: flgastro-2012-100244-s2.pdf [file flgastro-2012-100244-s2.pdf]

## Appendix 2

### DYSPHAGIA HOTLINE CLINIC

Patient details:

Date: .....

Date of Referral: .....

- I. Has the patient got true dysphagia Yes/No  
If no, what symptoms does the patient have?.....
- II. Duration of Dysphagia ..... weeks
- III. Is the dysphagia: Progressive Intermittent
- IV. Dysphagia to: Solids Liquids
- V. Level of Dysphagia: Pharyngeal Mid-sternal Lower sternal
- VI. Weight change during duration of symptoms: .....
- VII. Any regurgitation or choking? Yes/No
- VIII. Does the patient have:  
reflux symptoms Yes/No  
odynophagia Yes/No  
Any associated chest pain Yes/No
- IX. Diet – Has the patient altered their diet as a consequence of their symptoms? Yes/No  
If yes, please give details .....
- X. Is the patient taking a PPI or H<sub>2</sub> blocker? Yes/No  
If yes, please specify drug and effect on symptoms .....
- XI. Tick the following if applicable:-  
Warfarin  Diabetes  Asthma  Eczema  Allergies.....
- XII. Clinical diagnosis: **(Please tick)**
- |                  |                                |
|------------------|--------------------------------|
| Ca oesophagus    | Other Motility Disorder        |
| Peptic stricture | Pharyngeal pouch               |
| GORD             | Schatzki ring                  |
| Achalasia        | Functional (globus phenomenon) |
| Normal           |                                |
- Other: please specify .....
- XII. Outcome:  
OGD Ba Swallow Ba Swallow & OGD  
Other: specify

---

**FOR DEPARTMENT OF RADIOLOGY USE:**

Ba swallow findings:

Name of Radiologist: .....
